# Supplementary material for: Reassessing the role of internalin B in Listeria monocytogenes virulence using the epidemic strain F2365
Source: PubMed Central journal article supplement (PMC6365677; doi:10.1016/j.cmi.2018.08.022), 2019-02

## 1 **Materials and methods**

### 2 *Bacterial strains and cell lines*

3 The epidemic lineage I *L. monocytogenes* strain F2365 of serotype 4b responsible for  
4 the 1985 California listeriosis outbreak was used as parental strain (BUG3012; UIBC  
5 bacterial collection). An isogenic mutant strain (F2365 InIB+, BUG3824) containing a  
6 functional InIB (a point mutation was introduced in the codon 34 (TAA to CAA)) was also  
7 used [12]. Bacteria were grown in brain heart infusion (BHI) medium with shaking at 200  
8 rpm in tubes at 37°C. Tissue culture cells used in this study were HeLa cells (human  
9 epithelial cervix cells; ATCC CCL2), Jeg-3 cells (human epithelial placenta cells; ATCC  
10 HTB-36) and RAW 264.7 cells (BALB/c mouse macrophage cells; ATCC TIB-71). Cells  
11 were maintained in Dulbecco's modified Eagle's medium (DMEM) (Gibco) with 2 mM  
12 GlutaMAX (4 mM for RAW 264.7 cells) supplemented with 10% (vol/vol) fetal calf serum  
13 (BioWest). Cells were grown at 37°C with 10% CO<sub>2</sub>.

14

### 15 *Western blot*

16 Bacteria grown overnight were pelleted and re-dissolved in 1 ml PBS and complete  
17 protease inhibitor (Roche Diagnostics, 1 tablet per 100 ml), and lysed by sonication (3  
18 cycles of 10 s, 20% amplitude). Protein extracts were electrophoresed and analyzed by  
19 Western blotting using as primary antibodies rabbit polyclonal antibody anti-InIB [23]  
20 and rabbit polyclonal antibody anti-EF-Tu as loading control (R114) [24].

21

## 22 *Cell infection*

23 For bacterial infection, eukaryotic cell lines were cultured in 96-well tissue culture plates  
24 to attain 80% confluence on the day of infection. Overnight cultures of bacterial strains  
25 were washed three times with PBS and resuspended in infection medium (1% fetal  
26 bovine serum [FBS]) at an MOI of 2 (phagocytic RAW 264.7), 5 (epithelial JEG-3 with  
27 InIA and InIB-dependent entry) or 25 (epithelial HeLa with only InIB-dependent entry).  
28 Cells were centrifuged for 1 min at 1,000 rpm to synchronize infection. Eukaryotic cells  
29 were then incubated with the bacteria for 30 min (JEG-3 and RAW 264.7) or 1 h (HeLa)  
30 at 37°C. Following this incubation, the cells were washed, and extracellular bacteria  
31 were neutralized by adding complete fresh medium containing 40 µg/ml of gentamicin.  
32 At 2h post infection (p.i.), cells were washed with PBS and finally lysed in distilled water  
33 containing 0.1% Triton X-100. The number of viable intracellular *L. monocytogenes* cells  
34 was determined by serial dilution and colony counting on BHI agar plates. Six technical  
35 replicates per bacterial strain were used and repeated three times using independent  
36 clones of each of the strains. Statistical analyses were conducted by using the Student's  
37 t test.

38

## 39 *Luciferase reporter system experiments*

40 A transcriptional fusion was created by cloning 308 nucleotides upstream from the *inIB*  
41 initiation codon into Swal–Sall-digested pPL2<sup>lux</sup> as described [8, 25]. The resultant  
42 plasmid pPL2<sup>inIB:lux</sup> was isolated from *E. coli* and introduced into *L. monocytogenes* InIB+  
43 F2365 generating F2365 InIB+<sup>inIB:lux</sup> (BUG4155).

44

45 For *in vivo* bioluminescence experiments, 6- to 8-week-old female BALB/c mice  
46 (Charles River, Inc., France) were infected orally with  $5 \times 10^9$  *L. monocytogenes* F2365  
47 InIB+<sup>*inIB::lux*</sup> (BUG4155) cells grown in BHI broth to an optical density of 1.0 at 37°C.  
48 Bioluminescence imaging was accomplished using an IVIS Spectrum *in vivo* imaging  
49 system (Perkin Elmer) with a 5-min exposure time. Mice were anesthetized with  
50 isoflurane. For CFU determinations, liver and spleen were obtained, homogenized, and  
51 serially diluted and plated on BHI agar plates.

52

### 53 *Mouse infections*

54 Six- to eight-week-old female BALB/c mice were injected intravenously with  $10^4$  CFU of  
55 the indicated strain. Mice were sacrificed at 72 and 96h after infection (four mice in each  
56 group), and livers and spleens were removed. Half of the organ was used to assess  
57 bacterial load and the other half was used for histological analysis. To assess bacterial  
58 load, organs were homogenized and serially diluted. Dilutions were plated onto BHI  
59 plates and grown during 24 h at 37°C. Colonies were counted to assess bacterial load  
60 per organ. Statistically significant differences were evaluated by the Mann-Whitney test.  
61 Liver and spleen tissue sections from mice intravenously infected with the F2365 and  
62 F2365 InIB+ sacrificed at 72 and 96h p.i. were fixed in 10% neutral buffered formalin  
63 and routinely processed for the histopathological analysis. Four-micrometer sections of  
64 each organ were stained with hematoxylin and eosin (H&E). The number of necrotic foci  
65 as well as the ratio necrotic area / total area were recorded. Image J software was used

66 to perform the morphometric analysis. All slides were internally coded and analyzed  
67 blindly. Statistically significant differences were evaluated by the Mann-Whitney test.

68

69 *Ethics statement*

70 This study was carried out in strict accordance with the French national and European  
71 laws and conformed to the Council Directive on the approximation of laws, regulations,  
72 and administrative provisions of the Member States, regarding the protection of animals  
73 used for experimental and other scientific purposes (86/609/EEC). Experiments that  
74 relied on laboratory animals were performed in strict accordance with the Institut  
75 Pasteur's regulations for animal care and use protocol, approved by the Animal  
76 Experiment Committee of the Institut Pasteur (approval no. 03-49).

77

78

79

80

81

82

83

84

85 **Supplementary Figure 1.** Clustal alignment showing *inlB* sequences in *L.*  
86 *monocytogenes* EGD-e and F2365. Note that *L. monocytogenes* F2365 carries a  
87 nonsense mutation in codon number 34

88

89 **Supplementary figure 2. Bioluminescence imaging of *inlB inlA*-independent**  
90 **transcription.** (A) Absence of induction of the *inlB* promoter in liver and spleen after  
91 intragastric inoculation of four mice with  $5 \times 10^9$  bacteria per BALB/c mouse. C- control  
92 non-infected mouse. Images were acquired at the indicated hours after infection with an  
93 IVIS Spectrum Imaging System. Images were taken before (top panel) and after (bottom  
94 panel) abdominal skin and peritoneum dissection showing liver and spleen removed  
95 from mice. (B) Bacterial counts in the spleen and liver of the same mice at 24, 48 and  
96 72 h p.i.

97

98 **Supplementary figure 3. Spleen and liver histopathological lesions.** BALB/c mice  
99 were injected intravenously with  $10^4$  CFU of the indicated strains. Mice were killed at 72  
100 h p.i., and spleens and livers were removed. Half of the organ was used to assess  
101 bacterial load, and the other half was used for histopathological analysis. Arrowheads  
102 show necrotic foci.

103

Supplementary figure 1

CLUSTAL 2.1 multiple sequence alignment

```
InlBF2365      MKEKHNPRRKYCLISGLAIIIFSLWIIIGNGAKV-AETITVPTPIKQIFPDDAFAETIKDN 59
InlBEGDe      MKEKHNPRRKYCLISGLAIIIFSLWIIIGNGAKVQAETITVPTPIKQIFSDDAFAETIKDN 60
*****

InlBF2365      LKKKSVTDLVTQSELNSIDQIIANNSDIKSIQGIQYLPNVTKLFLNGNKLTDIKPLANLK 119
InlBEGDe      LKKKSVTDLVTQSELNSIDQIIANNSDIKSVQGIQYLPNVTKLFLNGNKLTDIKPLANLK 120
*****

InlBF2365      NLGWLFLDENKIKDLSLKDLDKLLKLSLEHNGISDINGLVHLLQLESYLGNNKLTIDIT 179
InlBEGDe      NLGWLFLDENKVKDLSLKDLDKLLKLSLEHNGISDINGLVHLPQLESYLGNNKLTIDIT 180
*****

InlBF2365      ILSRLTKLDLTSLEDNEISDIVPLSGLTKLQNLVLSKNHISDLRALAGLKNLDVLELFSQ 239
InlBEGDe      VLSRLTKLDLTSLEDNQISDIVPLAGLTKLQNLVLSKNHISDLRALAGLKNLDVLELFSQ 240
*****

InlBF2365      ECLNKSINHQMNLVVPNTVKNIIDGSLVTPPEIISDDGDYEKPNVKWHLPEFINEVSFIYQ 299
InlBEGDe      ECLNKPINHQMNLVVPNTVKNIIDGSLVTPPEIISDDGDYEKPNVKWHLPEFTNEVSFIYQ 300
*****

InlBF2365      PVTVGKAKARFHGRVTQPLKEVYTVSYDVDGTVIKTKVEAGTRITAPKPPTKQGYVFKGW 359
InlBEGDe      PVTIGKAKARFHGRVTQPLKEVYTVSYDVDGTVIKTKVEAGTRITAPKPPTKQGYVFKGW 360
*****

InlBF2365      YTEKNGGHEWNFSTDYMSGNDFTLVAVFKAETTEKAVNLTRYVKYIRGNAGIYKLPREDN 419
InlBEGDe      YTEKNGGHEWNFNTDYMSGNDFTLVAVFKAETTEKAVNLTRYVKYIRGNAGIYKLPREDN 420
*****

InlBF2365      SLKQGTLASHRCKALTVDREARNGGELWYRLKNIGWTKAENLSLDRYDKIEYDKGVTAYA 479
InlBEGDe      SLKQGTLASHRCKALTVDREARNGGELWYRLKNIGWTKAENLSLDRYDKMEYDKGVTAYA 480
*****

InlBF2365      RVKNAPGNVAVTKPYNTAGATLVNKLVSQYQGNMRLREAKTPITTWYQFSIDGKVIQGW 539
InlBEGDe      RVRNASGNSVWTKPYNTAGAKHVNKLVSQYQGNMRLREAKTPITTWYQFSIGGKVIQGW 540
**:*

InlBF2365      DTRALNTFYKQSMETPIQLTRYVSANKGNEAYYKVPVVDSPIKWGTLAKYKNQTLIVDRT 599
InlBEGDe      DTRALNTFYKQSMETPTLRLTRYVSANKAGESYKVPVADNPVKGRTLAKYKNQKLIIVDCQ 600
*****

InlBF2365      ATVEGQLWYRIRTSSTFIGWTKAANLRAQK- 629
InlBEGDe      ATIEGQLWYRIRTSSTFIGWTKAANLRAQK- 630
**:
```

**A**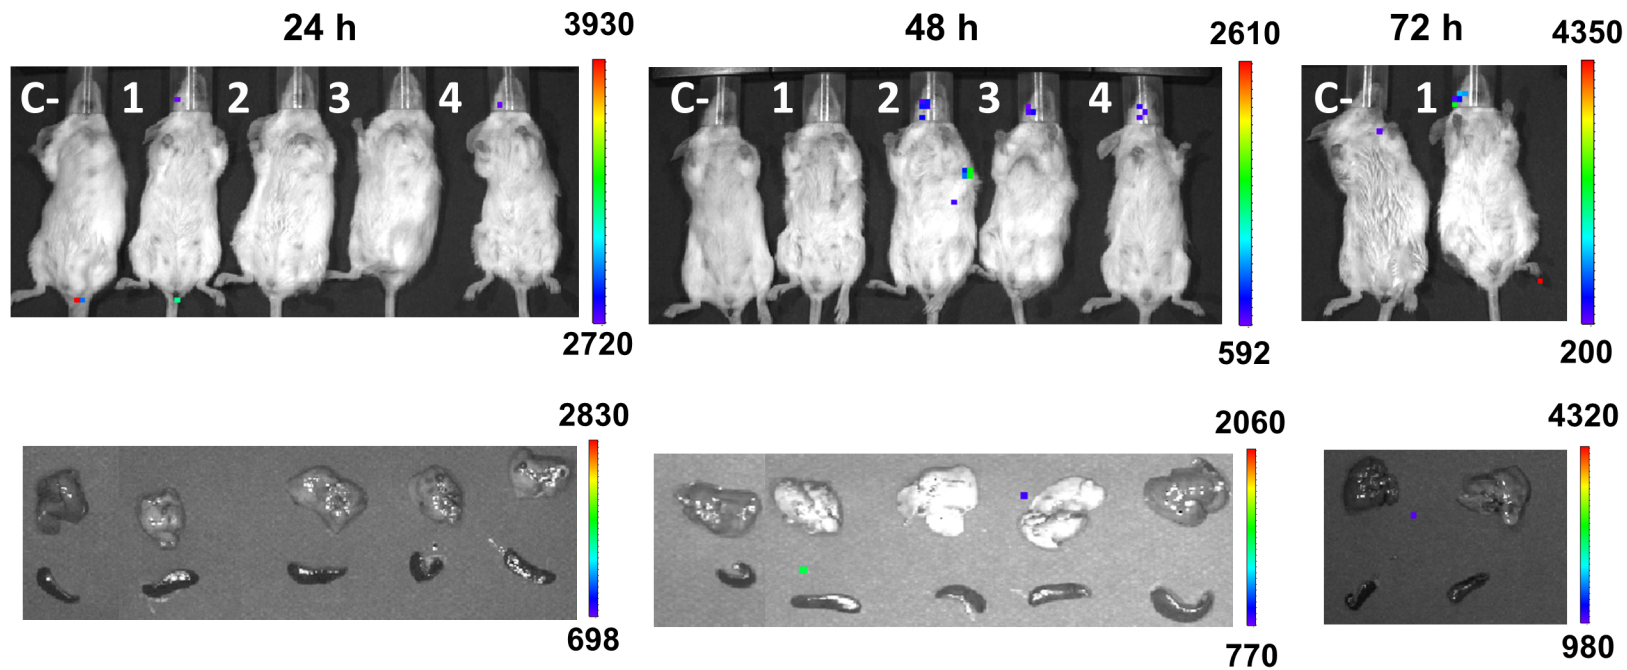**B**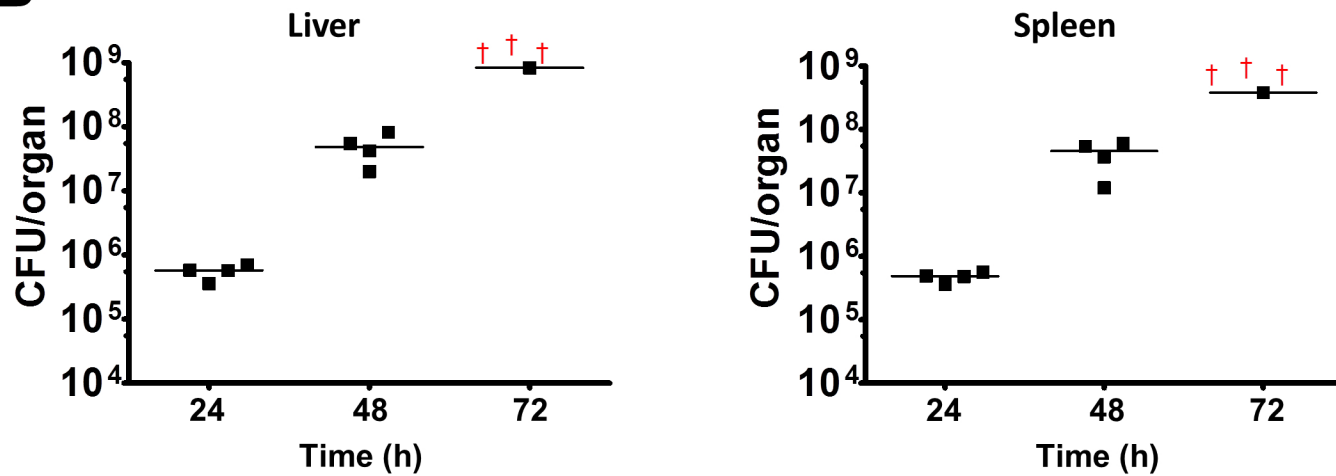

A

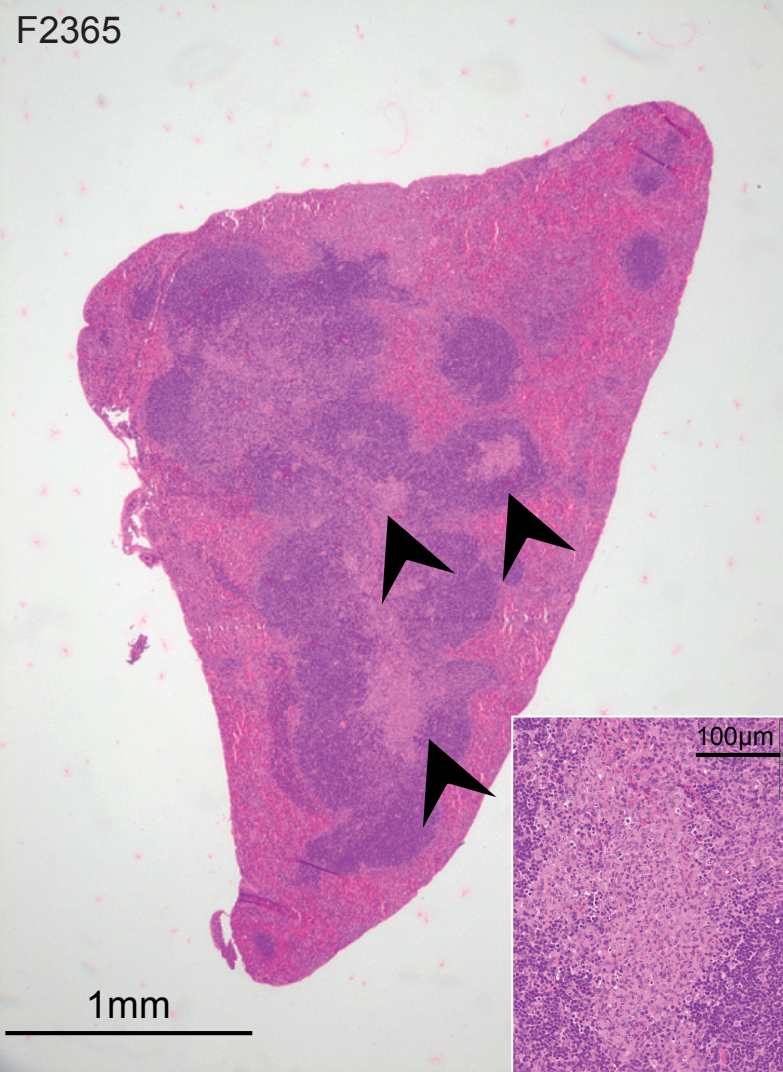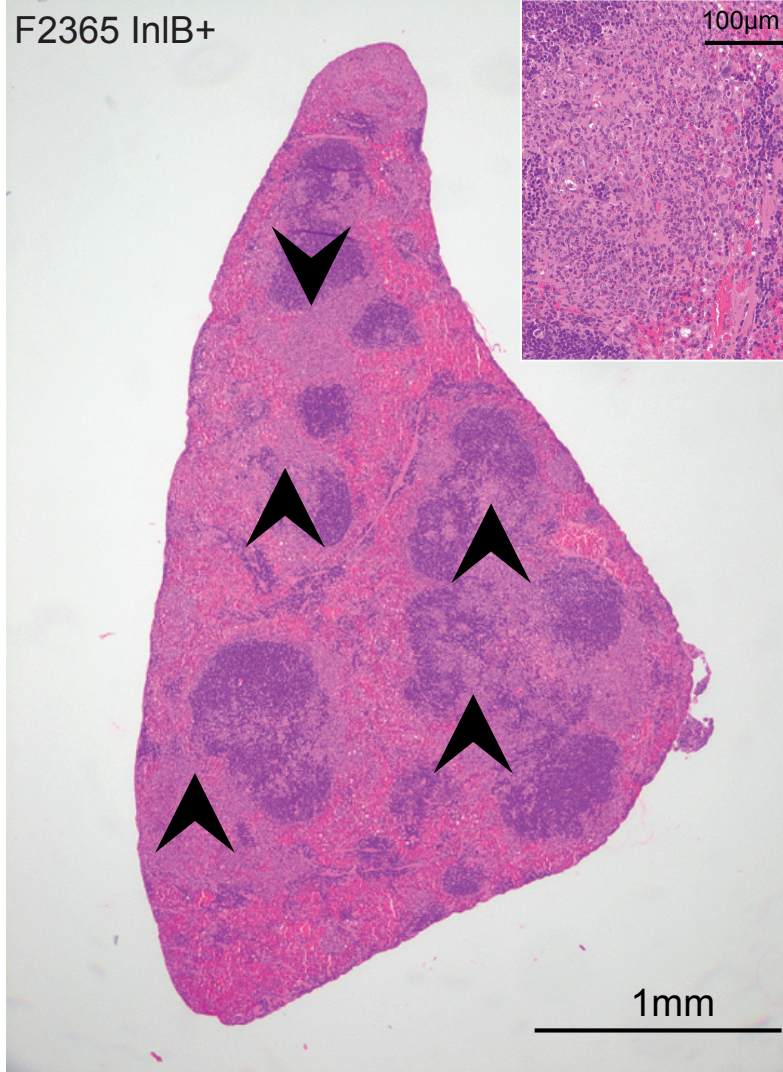

B

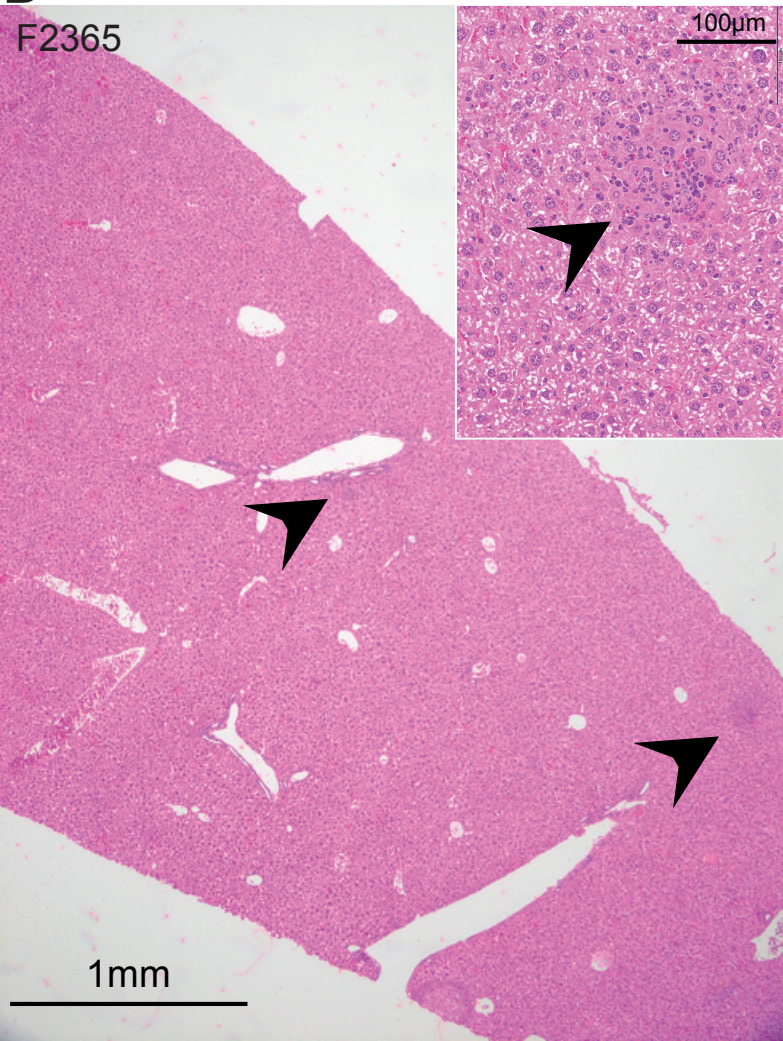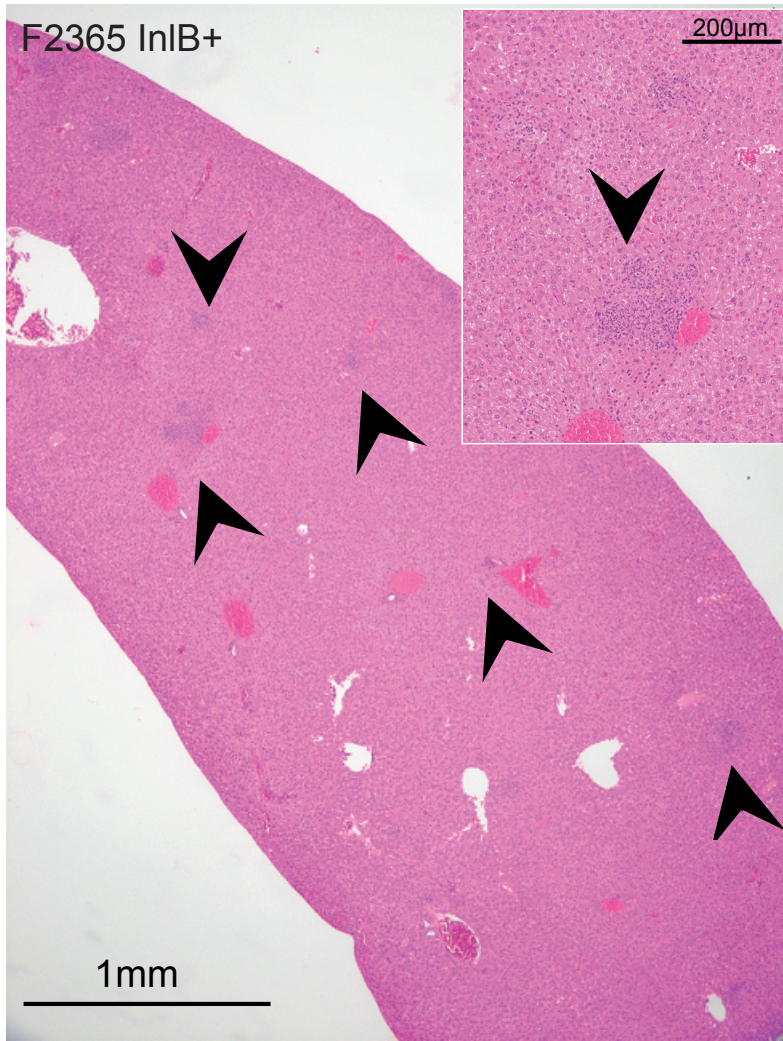

Supplement: mmc1.pdf [file mmc1.pdf]
